# Supplementary material for: Organophosphate insecticide use and cancer incidence among spouses of pesticide applicators in the Agricultural Health Study
Source: HighWire-hosted journal article supplement (doi:10.1136/oemed-2014-102798), 2015-07-06
Supplement: oemed-2014-102798supp_revised_table.pdf [file oemed-2014-102798supp_revised_table.pdf]

**Supplementary Table 1:** Organophosphate insecticides reported by spouses (lifetime ever use prior to enrollment)

|                     | N      | %    | Correlated Pesticides <sup>1</sup> | $\rho$ |
|---------------------|--------|------|------------------------------------|--------|
| Any pesticide use   | 16,857 | 55.9 |                                    |        |
| Any organophosphate | 7,589  | 25.9 | Glyphosate                         | 0.41   |
|                     |        |      | 2,4-D                              | 0.40   |
|                     |        |      | Carbaryl                           | 0.53   |
| Chlorpyrifos        | 1,165  | 4.0  | Carbofuran                         | 0.41   |
|                     |        |      | Terbufos                           | 0.45   |
|                     |        |      | Alachlor                           | 0.40   |
| Coumaphos           | 370    | 1.3  |                                    |        |
| Diazinon            | 2,998  | 10.3 |                                    |        |
| Dichlorvos          | 736    | 2.5  |                                    |        |
| Fonofos             | 552    | 1.9  | Carbofuran                         | 0.47   |
|                     |        |      | Terbufos                           | 0.49   |
| Malathion           | 5,704  | 19.5 | Carbaryl                           | 0.47   |
| Parathion           | 308    | 1.1  |                                    |        |
| Phorate             | 572    | 2.0  | Terbufos                           | 0.43   |
| Terbufos            | 847    | 2.9  | Alachlor                           | 0.43   |
|                     |        |      | Atrazine                           | 0.44   |
|                     |        |      | Carbofuran                         | 0.48   |
|                     |        |      | Chlorpyrifos                       | 0.45   |
|                     |        |      | Cyanazine                          | 0.43   |
|                     |        |      | Dicamba                            | 0.40   |
|                     |        |      | Fonofos                            | 0.49   |
|                     |        |      | Imazethapyr                        | 0.40   |
|                     |        |      | Metolachlor                        | 0.42   |
|                     |        |      | Phorate                            | 0.43   |
| Trichlorfon         | 71     | 0.3  |                                    |        |

<sup>1</sup> Spearman  $\rho > 0.40$
